# Supplementary material for: A neural network model was constructed by screening the potential biomarkers of aortic dissection based on genes associated with pyroptosis
Source: publisher site journal article supplement (doi:10.18632/aging.205187), 2023-11-07
Supplement: Supplementary file [file aging-v15i21-205187-supplementary-material-SD1.pdf]

## SUPPLEMENTARY TABLE

Supplementary Table 1. Gene qRT-PCR sequence.

---

|          |                         |
|----------|-------------------------|
| CASP4-F  | GTGGTGAAAGAGGAGCTTACAGC |
| CASP4-R  | GCACCAGGAATGTGCTGTCTGA  |
| MLKL-F   | ATCAGCCGGACAGCAAAGAG    |
| MLKL-R   | GAATCACAGCCTTCAAATGGG   |
| APIP-F   | AAGGCAACTGCTGTCCTTGT    |
| APIP-R   | TTCAGCCTGTGTCTTGCCAT    |
| PECAM1-F | ATGGAGCAGGACAGGTTTCAGTC |
| PECAM1-R | AAGTGGAGTCCAGCCGCATATC  |
| HDAC6-F  | AAGTGAAGAAGCCGTGCTA     |
| HDAC6-R  | ATCATAGACCAGCCCAGTGC    |

---
